# Supplementary material for: Evidence of water dissociation and hydrogenation on molybdenum carbide nanocatalyst for hydroprocessing reactions
Source: Royal Society of Chemistry journal article supplement (doi:10.1039/d2cy01341j), 2022-01-01
Supplement: d2cy01341j1.pdf [file d2cy01341j1.pdf]

## Supporting Information

### **Evidence of water dissociation and hydrogenation on molybdenum carbide nanocatalyst for hydroprocessing reactions**

**Milad Ahmadi Khoshooei\***, Gerardo Vitale, Lante Carbognani, Pedro Pereira-Almao

*Department of Chemical and Petroleum Engineering, University of Calgary, Calgary, Alberta, T2N 1N4,  
Canada*

*\*E-mail: milad.ahmadikhoshooe@ucalgary.ca*

**Table S1** Hydrocarbon feedstock properties

|                                                                 |               |
|-----------------------------------------------------------------|---------------|
| Olefin content (wt%)*                                           | 1.2 ± 0.1     |
| H/C ratio**                                                     | 1.17 ± 0.01   |
| Viscosity at 373 K (cP)**                                       | 103,280 ± 971 |
| Specific gravity at 288.6 K**                                   | 1.111 ± 0.002 |
| Hydrocarbon distribution by normal boiling point (NBP) range:** |               |
| 489 K < NBP < 616 K, wt%                                        | 3%            |
| 616 K < NBP < 818 K, wt%                                        | 17%           |
| NBP > 818 K, wt%                                                | 80%           |

\* Based on <sup>1</sup>H-NMR analysis explained elsewhere <sup>1</sup>

\*\* Measurement methodologies explained elsewhere <sup>2</sup>

**Table S2** Analysis for H<sub>2</sub>-treated α-MoC<sub>1-x</sub> XRD peaks

| 2θ (°) | Plane | d <sub>spacing</sub> (nm) | Crystallite size (nm) |
|--------|-------|---------------------------|-----------------------|
| 37.4   | 111   | 0.241                     | 1.53                  |
| 43.6   | 200   | 0.207                     | 1.56                  |
| 63.1   | 220   | 0.147                     | 1.70                  |
| 76.9   | 311   | 0.124                     | 1.50                  |

**Table S3** Calculation of water consumption based on CO<sub>2</sub> yield for the cases of CAT-100S and CAT-50H/50S

|                                                    | CO <sub>2</sub> yield (mg.h <sup>-1</sup> )* | Water consumption (mg.h <sup>-1</sup> )** | Water consumption (cc.min <sup>-1</sup> ) | Feed water (cc.min <sup>-1</sup> ) |
|----------------------------------------------------|----------------------------------------------|-------------------------------------------|-------------------------------------------|------------------------------------|
| CAT-100S (Water only)                              | 10.92                                        | 2.48×10 <sup>-4</sup>                     | 1.5×10 <sup>-4</sup>                      | 4.0×10 <sup>-3</sup>               |
| CAT-50H/50S H <sub>2</sub> :H <sub>2</sub> O = 1:1 | 5.32                                         | 1.17×10 <sup>-4</sup>                     | 7.0×10 <sup>-5</sup>                      | 2.0×10 <sup>-3</sup>               |

\* The yield of CO<sub>2</sub> for thermal counterpart experiments under water vapor-only (Therm-100S) and Therm-50H/50S (H<sub>2</sub>O:H<sub>2</sub> = 1:1, molar ratio) was subtracted, 0.5715 and 0.1448 mg.h<sup>-1</sup>, respectively, to only account for production of CO<sub>2</sub> solely due to the water activation reaction network

\*\* A stoichiometric molar ratio of CO<sub>2</sub>:H<sub>2</sub>O of 1:2 was assumed

**Table S4** Hydrogen consumption estimation based on inlet and outlet hydrogen flowrates\*

|                          | H <sub>2</sub> flowrate in (μg.h <sup>-1</sup> ) | H <sub>2</sub> flowrate out (μg.h <sup>-1</sup> ) | H <sub>2</sub> consumption (%) |
|--------------------------|--------------------------------------------------|---------------------------------------------------|--------------------------------|
| CAT-100H (Hydrogen only) | 22.88                                            | 3.51                                              | 84.7                           |

|                                                       |       |      |      |
|-------------------------------------------------------|-------|------|------|
| CAT-100S<br>(Water only)                              | 0     | 0.55 | N/A  |
| CAT-50H/50S<br>H <sub>2</sub> :H <sub>2</sub> O = 1:1 | 11.44 | 2.23 | 80.5 |

\* Hydrogen flowrate was calculated based on the compositions, determined by GC, and the flowrates of inlet/outlet gas streams.

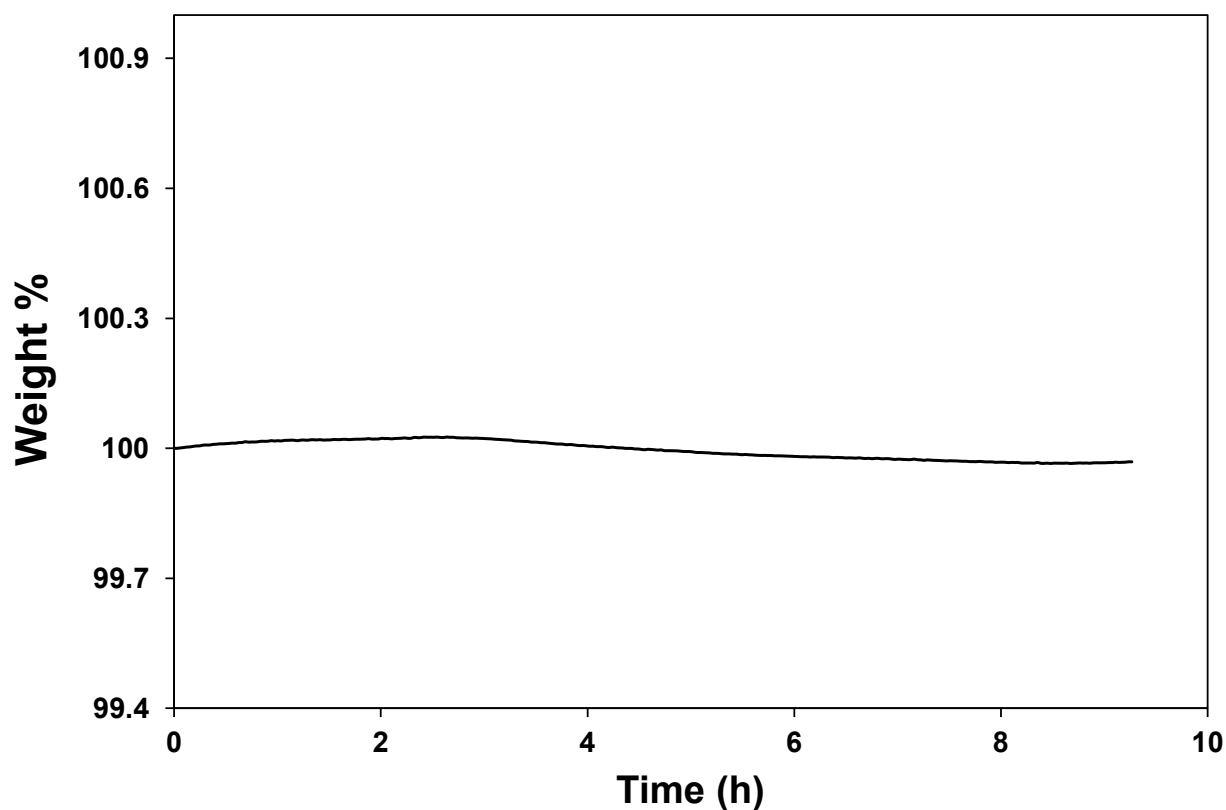

**Fig S1** Control adsorption experiment of D<sub>2</sub> on in-situ activated molybdenum carbide catalyst: Mass change vs. time on stream using TG at 623 K and 0.1 MPag, and D<sub>2</sub>:N<sub>2</sub> = 1:3 (20 sccm gas, 25 mg catalyst, no heavy hydrocarbons).

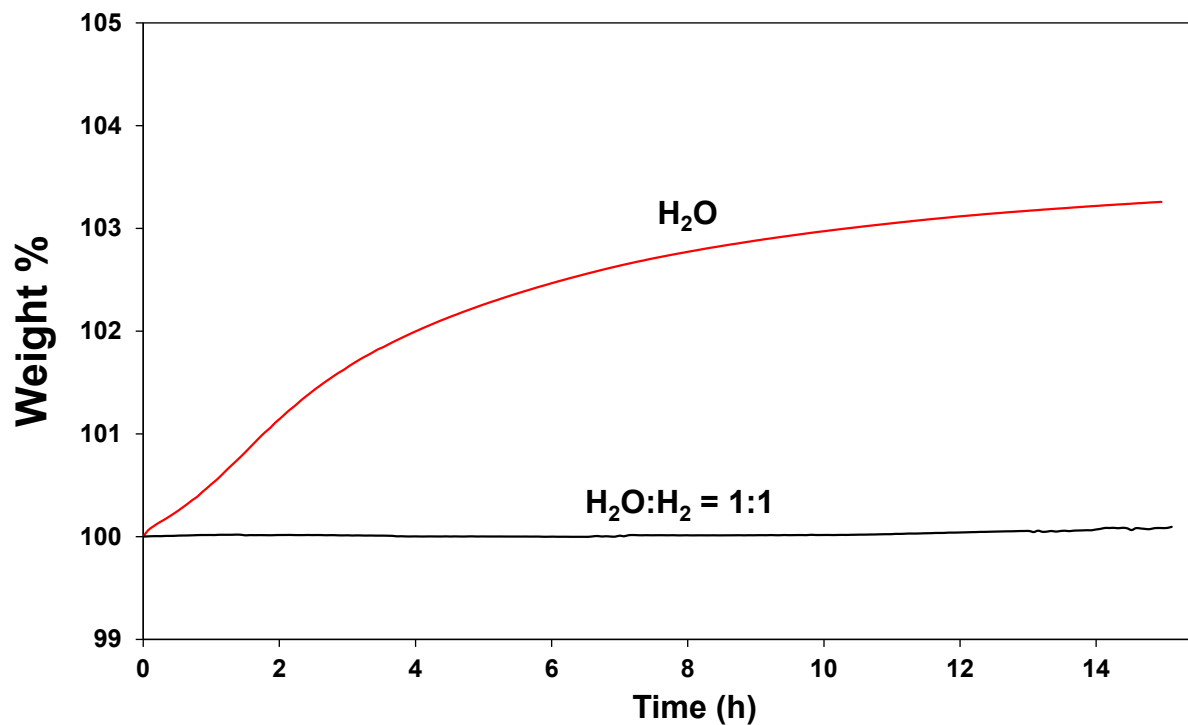

**Fig S2** Long-term adsorption of water on in-situ activated molybdenum carbide catalyst, studied by TG at 623 K and 0.1 MPag, in the absence (Water-saturated N<sub>2</sub>) and presence of hydrogen (H<sub>2</sub>O:H<sub>2</sub> = 1:1) (20 sccm gas, 25 mg catalyst, no heavy hydrocarbons).

#### References:

- 1 L. Carbognani, K. O. Sebakhy, M. Trujillo and P. Pereira-Almao, *Energy & Fuels*, 2020, **34**, 9252–9261.
- 2 M. Ahmadi Khoshoeei, S. M. Elahi, L. Carbognani, C. E. Scott and P. Pereira-Almao, *Fuel*, 2021, **288**, 119664.
